# Supplementary material for: Carbazole appendedtrans-dicationic pyridinium porphyrin finds supremacy in DNA binding/photocleavage over a non-carbazolyl analogue
Source: Royal Society of Chemistry journal article supplement (doi:10.1039/d2dt00555g), 2022-01-01
Supplement: d2dt00555g1.pdf [file d2dt00555g1.pdf]

## Electronic Supporting Information

### **Carbazole appended *trans*-dicationic pyridinium porphyrin finds supremacy in DNA binding/photocleavage over non-carbazolyl analogue**

Athulya Das,<sup>a</sup> Thasnim P Mohammed,<sup>a</sup> Rajesh Kumar,<sup>a</sup> Sarmistha Bhunia,<sup>b</sup> Muniyandi Sankaralingam<sup>\*a</sup>

<sup>a</sup>Bioinspired & Biomimetic Inorganic Chemistry Lab, Department of Chemistry, National Institute of Technology Calicut, Kozhikode-673601, Kerala, India.

<sup>b</sup>School of Chemical Sciences, Indian Association for the Cultivation of Science, Kolkata 700032, India

\*Corresponding author email: [msankaralingam@nitc.ac.in](mailto:msankaralingam@nitc.ac.in); [sankarjan06@gmail.com](mailto:sankarjan06@gmail.com)

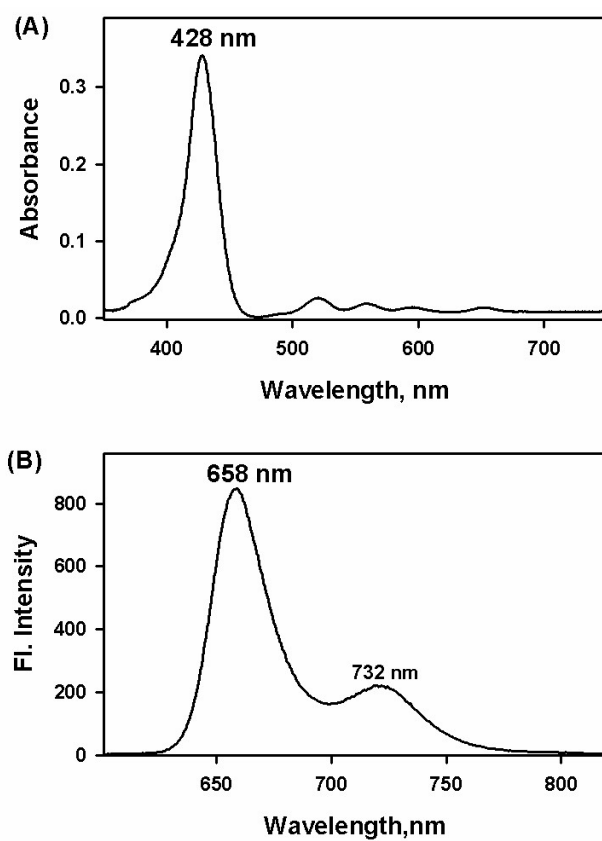

**Fig. S1.** (A) UV-visible absorption and (B) Fluorescence emission spectra of **1** recorded in  $\text{CHCl}_3$  at 298 K.

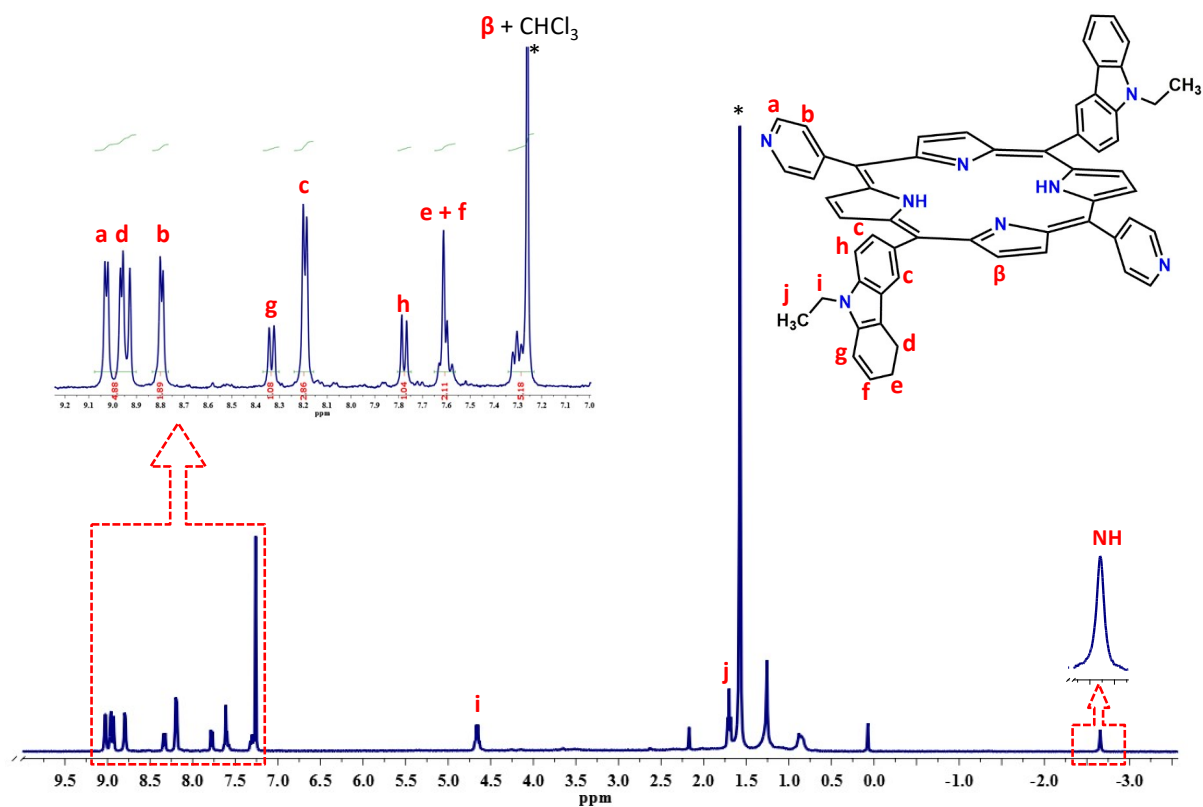

**Fig. S2.**  $^1\text{H}$  NMR spectrum of **1** recorded in  $\text{CDCl}_3$ . Marked peak with an asterisk (\*) at 1.56 and 7.26 ppm indicates residual  $\text{CDCl}_3$  and water respectively.

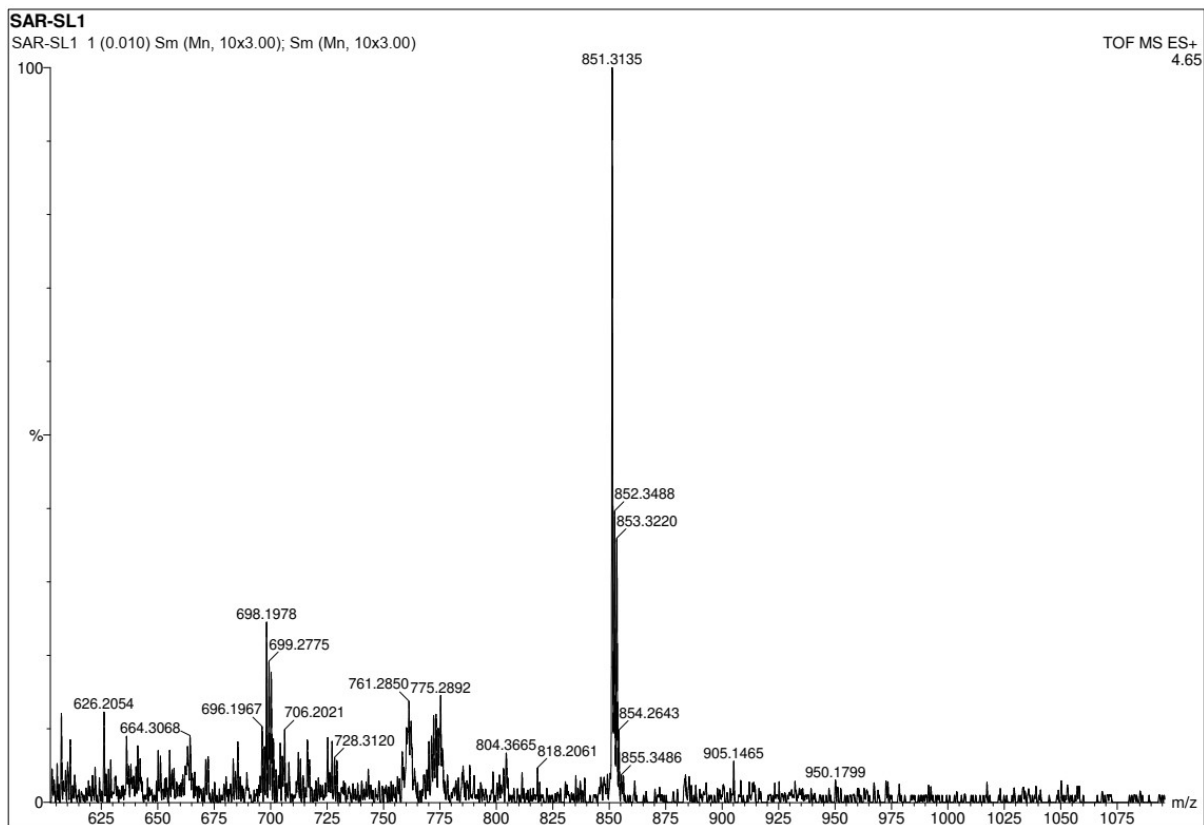

Fig. S3. Mass spectrum of **1** recorded in  $\text{CHCl}_3$ .

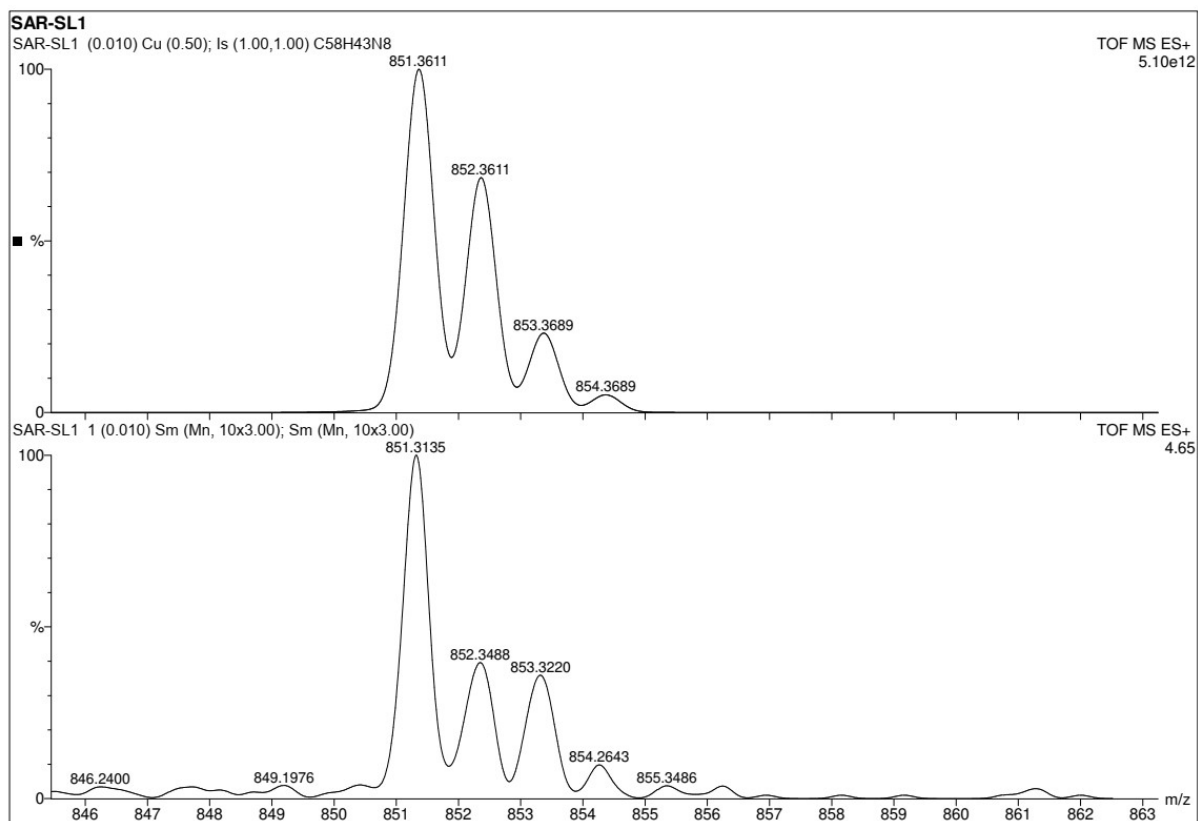

Fig. S4. Experimental (top) and theoretical (bottom) isotopic distribution of **1** was recorded in  $\text{CHCl}_3$ .

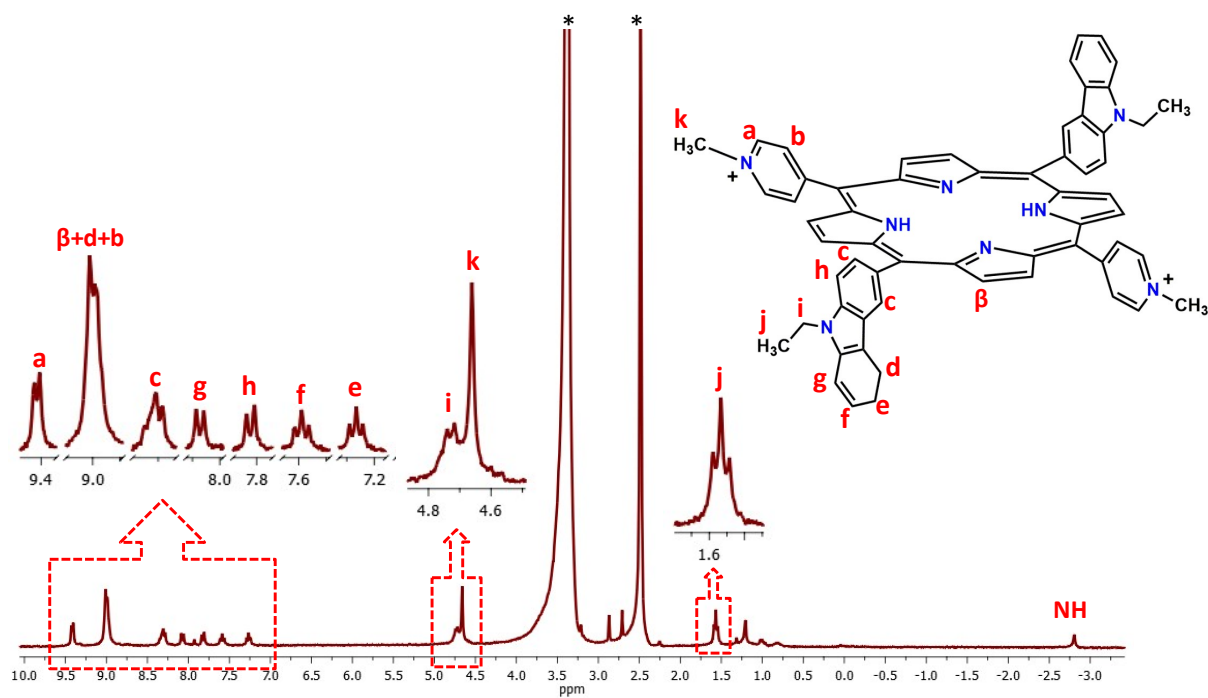

**Fig. S5.**  $^1\text{H}$  NMR spectrum of **2** recorded in  $\text{DMSO-}d_6$ . Marked peak with an asterisk (\*) at 2.5 and 3.5 ppm indicates residual DMSO and water, respectively.

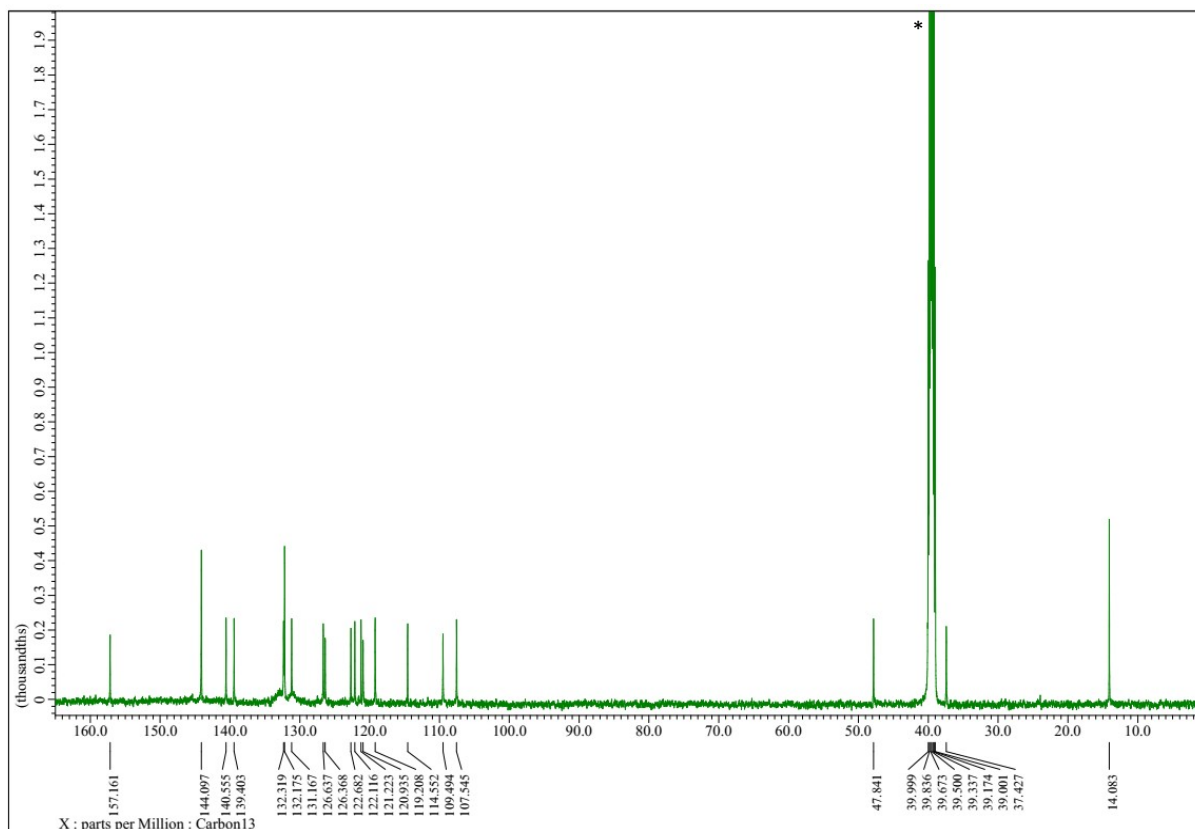

**Fig. S6.**  $^{13}\text{C}$  NMR spectrum of **2** recorded in  $\text{DMSO-}d_6$ . Marked peak with an asterisk (\*) at 39-39.9 ppm indicates residual DMSO.

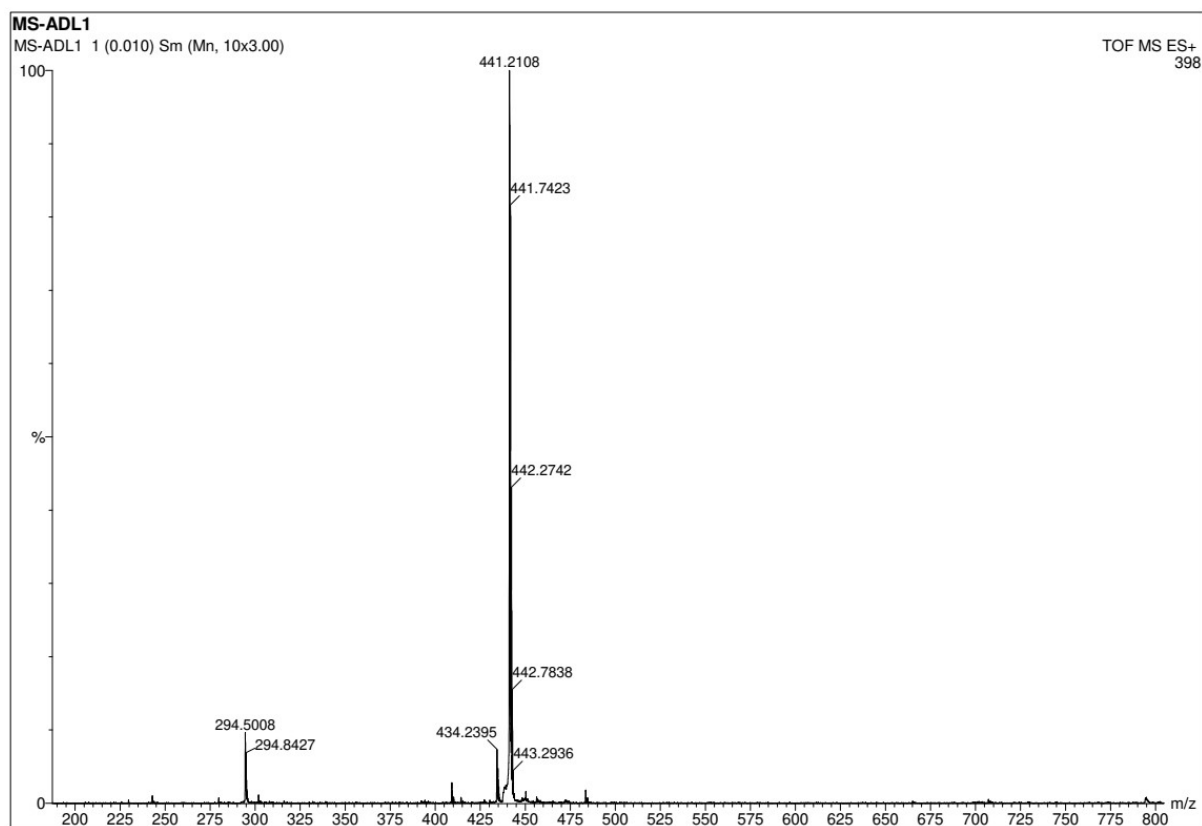

Fig. S7. Mass spectrum of **2** recorded in  $\text{CH}_3\text{OH}$ .

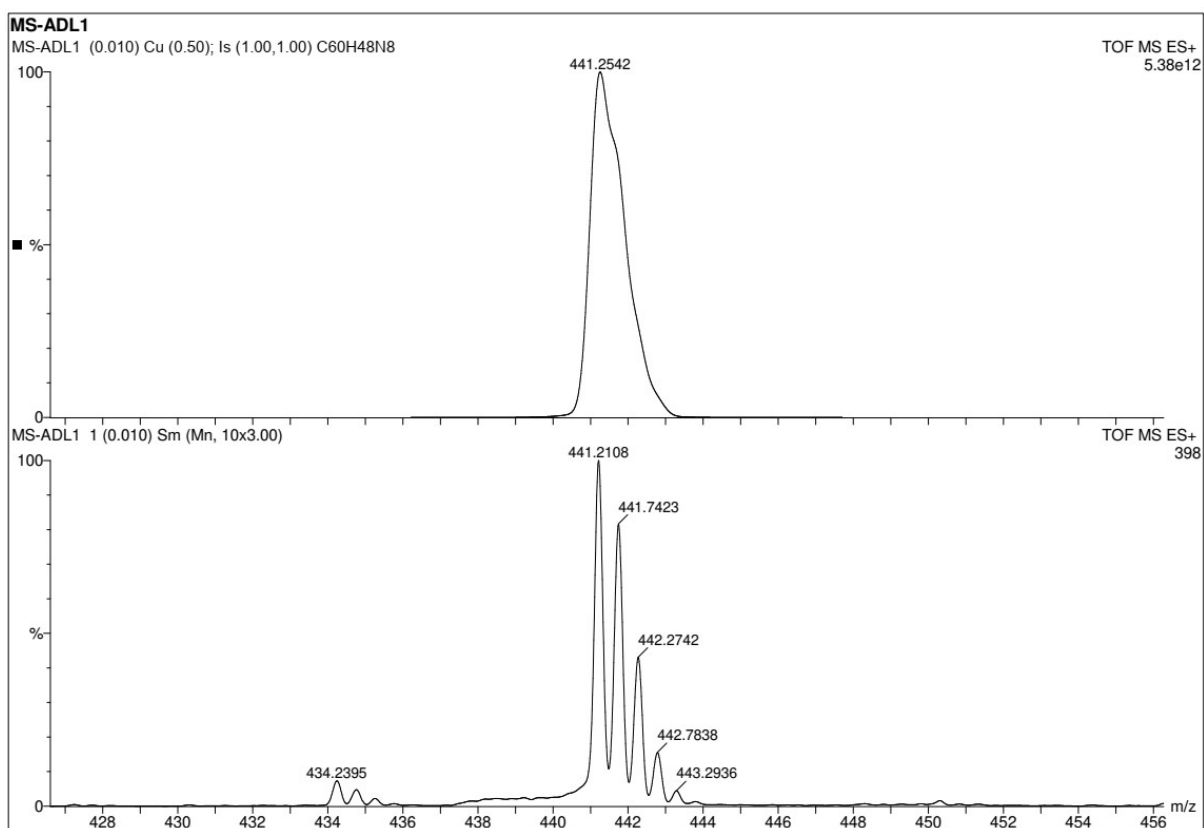

Fig. S8. Theoretical (top) experimental (bottom) isotopic distribution of **2** recorded in  $\text{CH}_3\text{OH}$ .

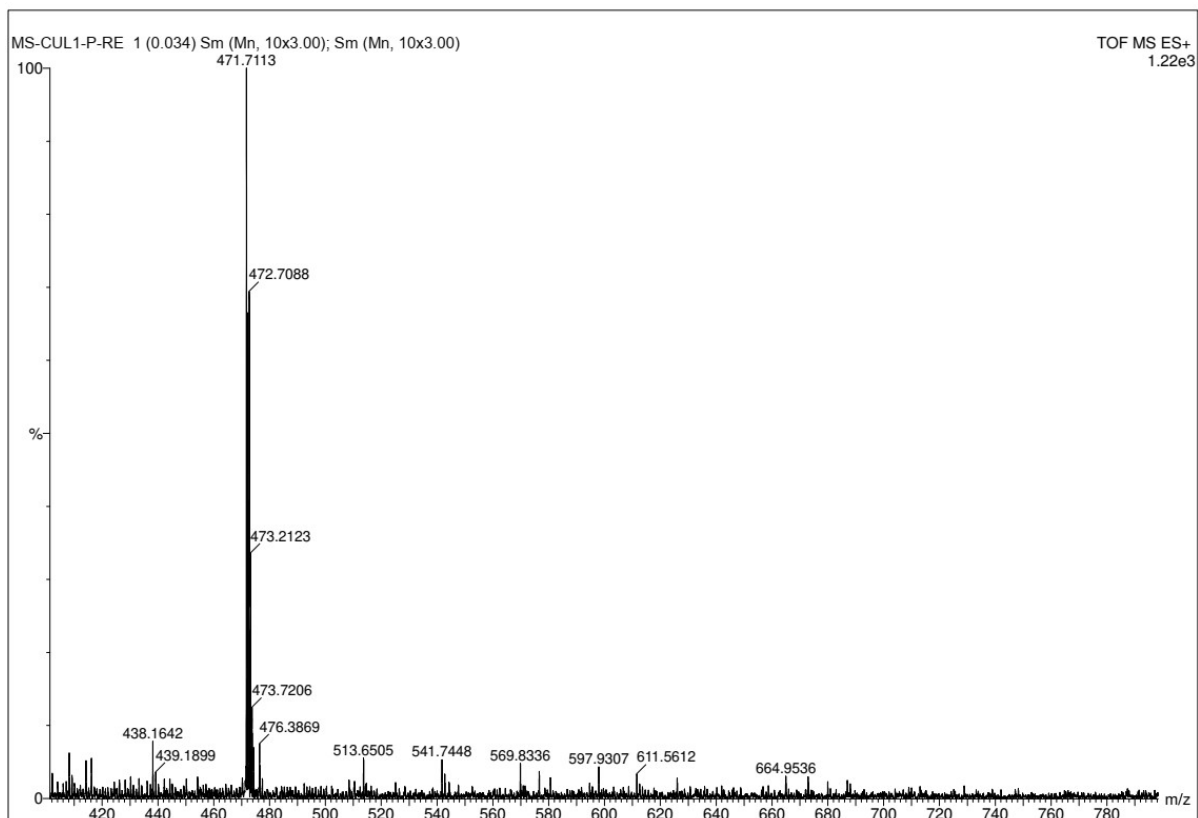

**Fig. S9.** Mass spectrum of **3** recorded in  $\text{CH}_3\text{OH}$ .

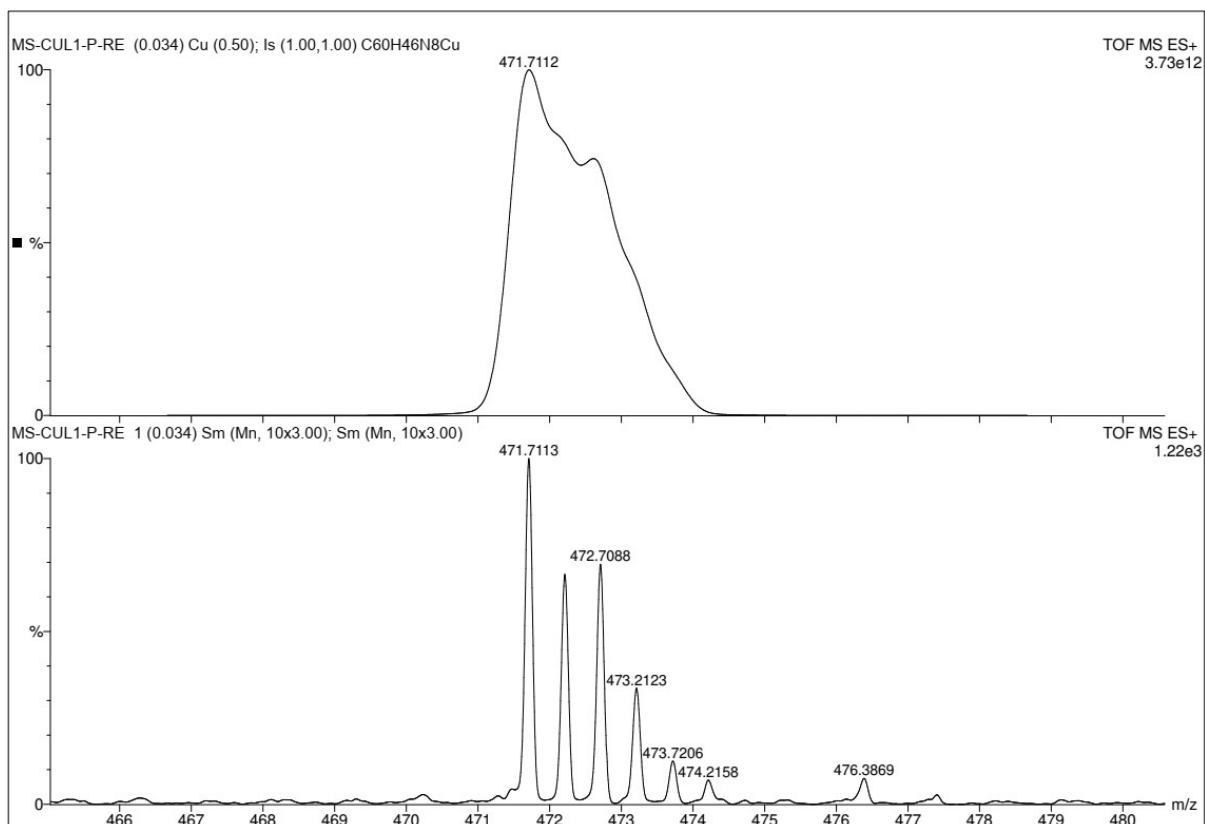

**Fig. S10.** Theoretical (top) experimental (bottom) isotopic distribution of **3** recorded in  $\text{CH}_3\text{OH}$ .

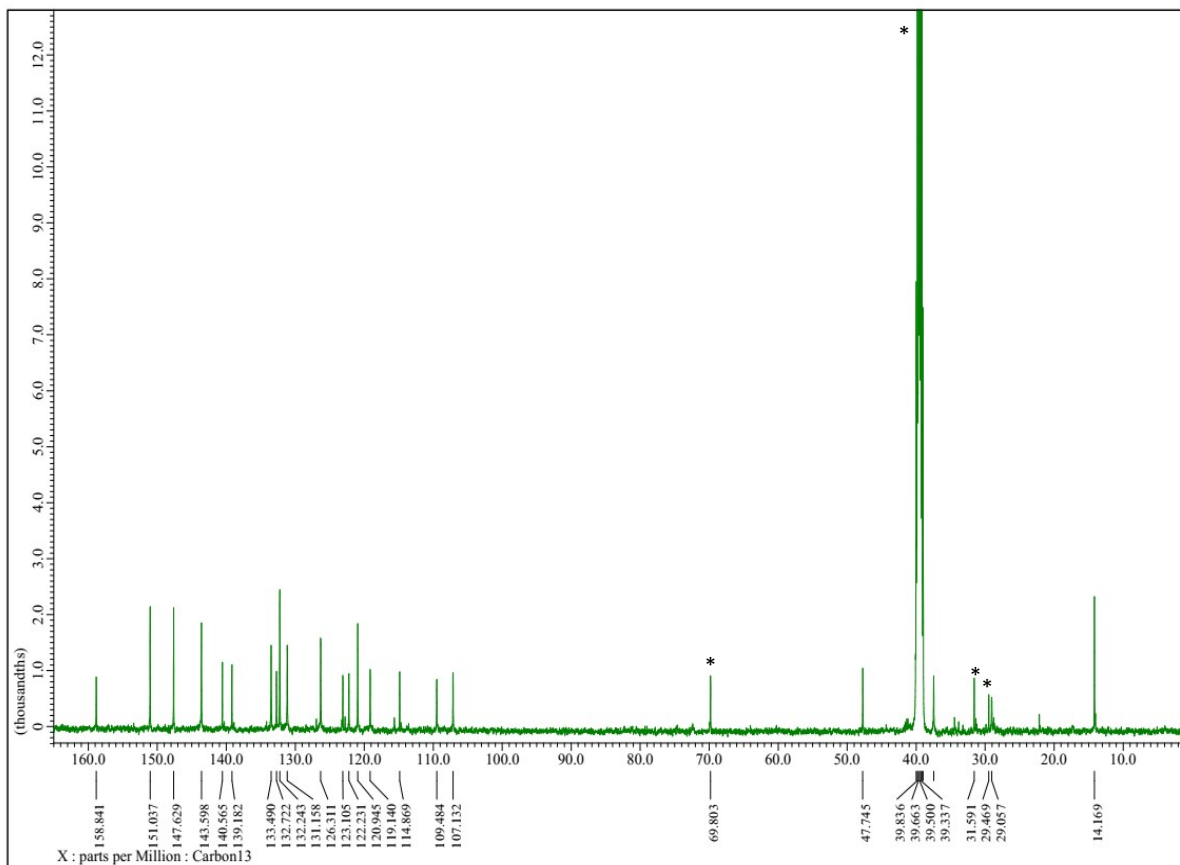

**Fig. S11.**  $^{13}\text{H}$  NMR spectrum of **4** recorded in  $\text{DMSO-}d_6$ . Marked peak with an asterisk (\*) at 39.1-39.8 ppm indicates residual DMSO, 29-31.5 ppm indicates hexane, and 69.8 ppm indicates chloroform.



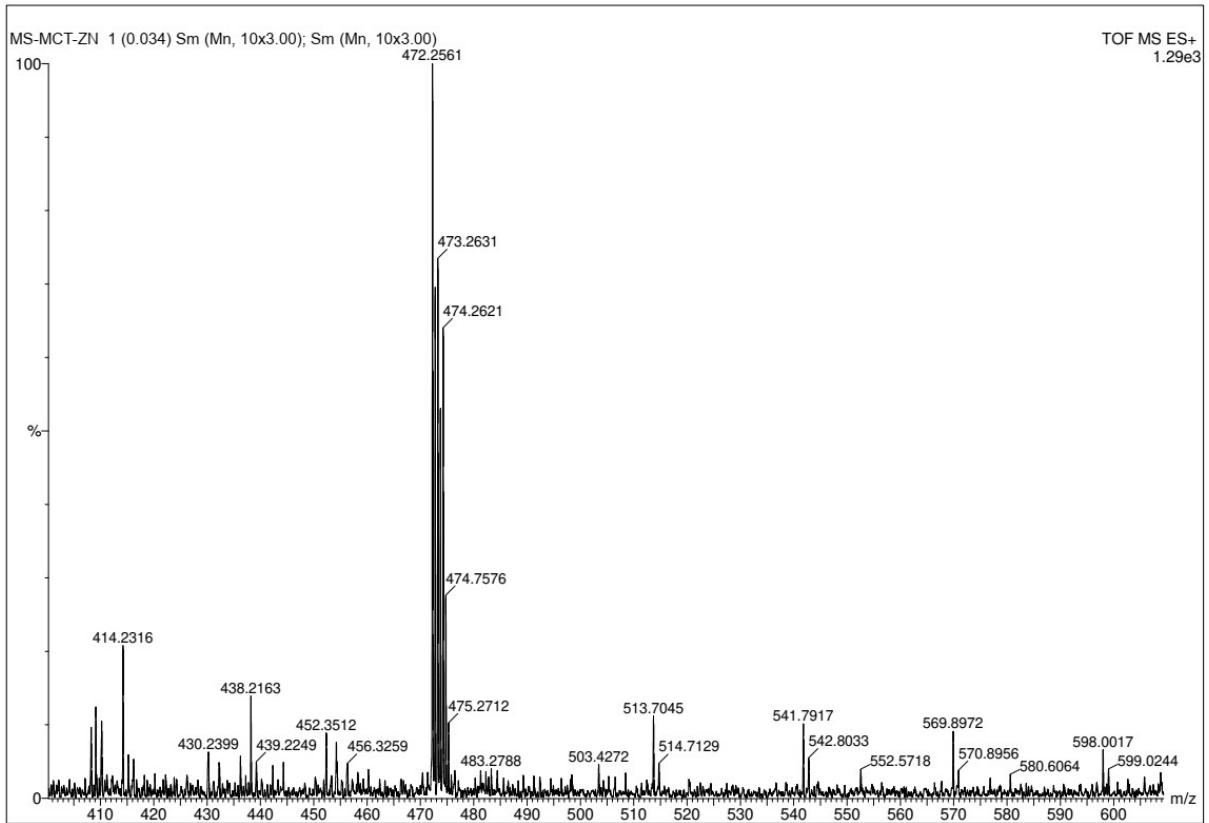

**Fig. S12.** Mass spectrum of **4** recorded in CH<sub>3</sub>OH.

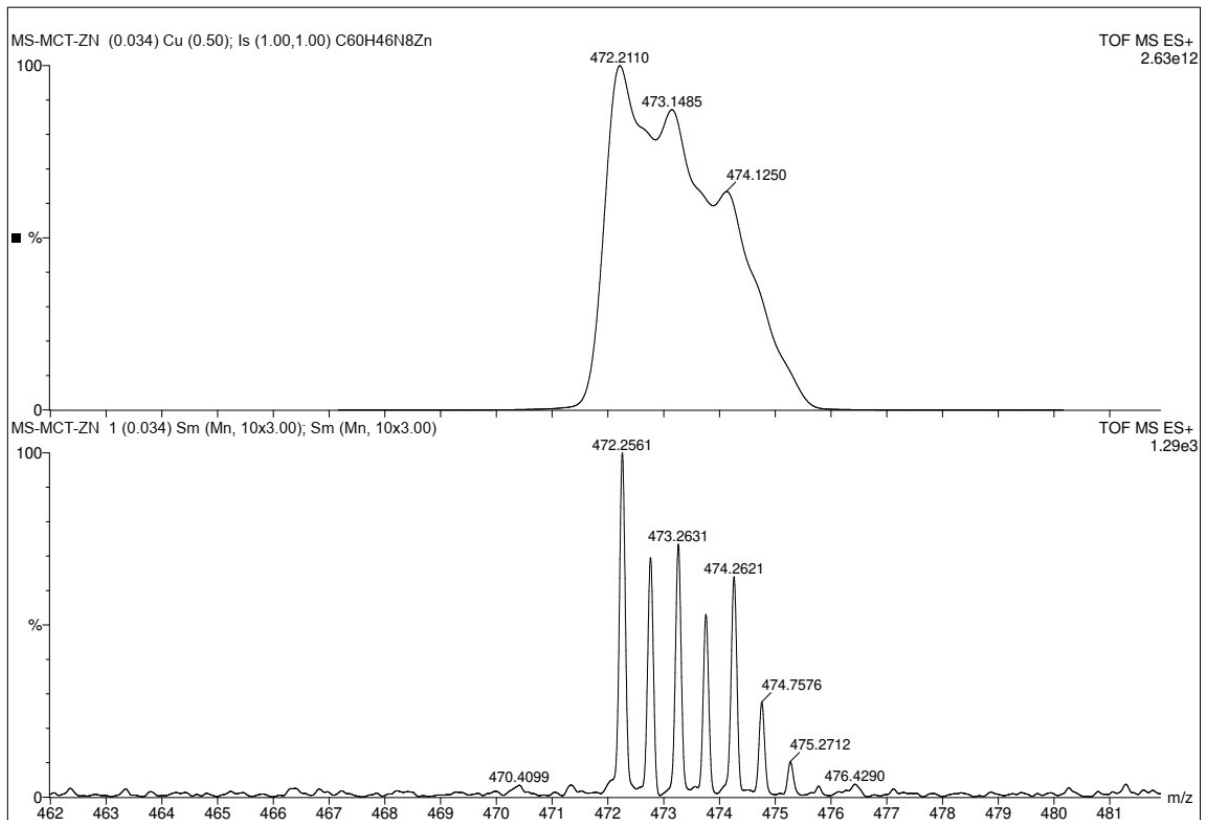

**Fig. S13.** Theoretical (top) experimental (bottom) isotopic distribution of **4** recorded in CH<sub>3</sub>OH.

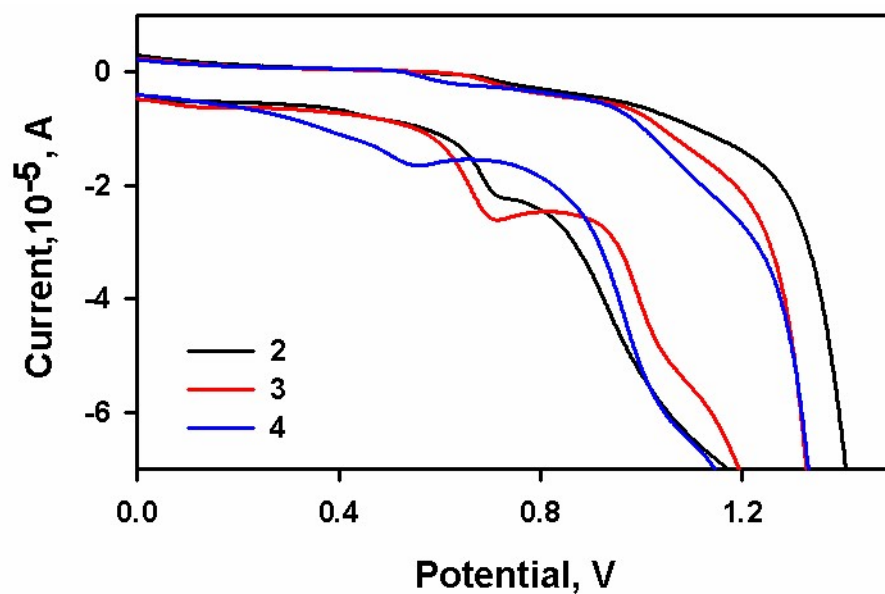

**Fig. S14.** Cyclic voltammograms (oxidation) of **2**, **3** and **4** in DMF containing 0.1 M tetrabutylammonium hexafluorophosphate as the supporting electrolyte with a scan rate of 0.1 V/s.

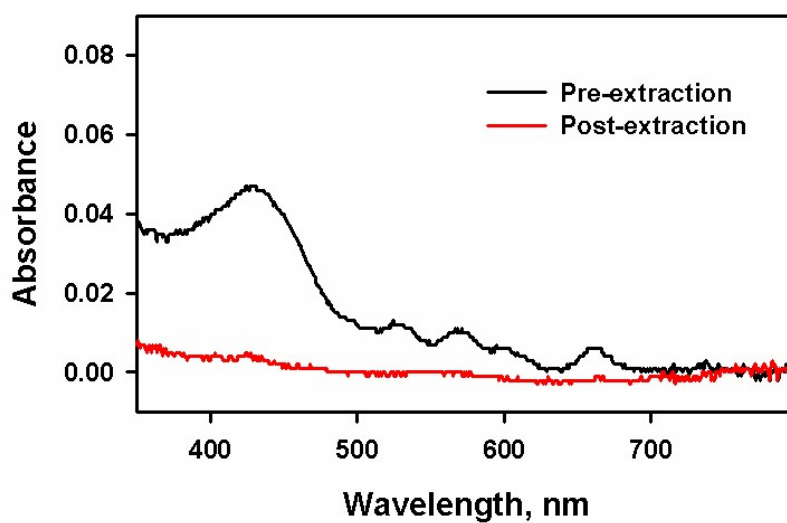

**Fig. S15.** UV-Visible spectra of compound **1** in aqueous phase before (black) and after (red) extraction with the water-saturated 1-octanol.

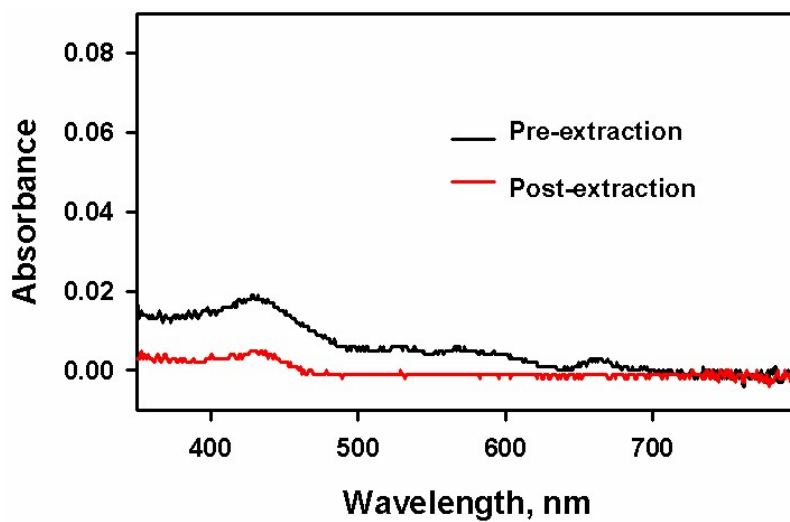

**Fig. S16.** UV-Visible spectra of compound **2** in aqueous phase before (black) and after (red) extraction with the water-saturated 1-octanol.

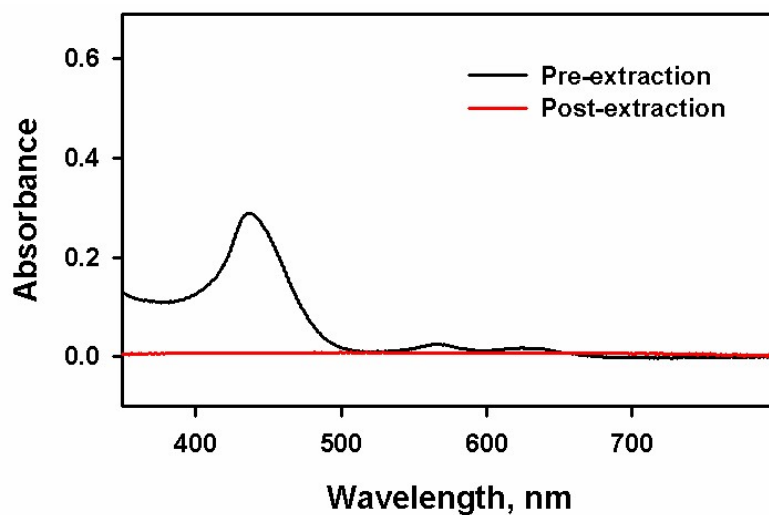

**Fig. S17.** UV-Visible spectra of compound **3** in aqueous phase before (black) and after (red) extraction with the water-saturated 1-octanol.

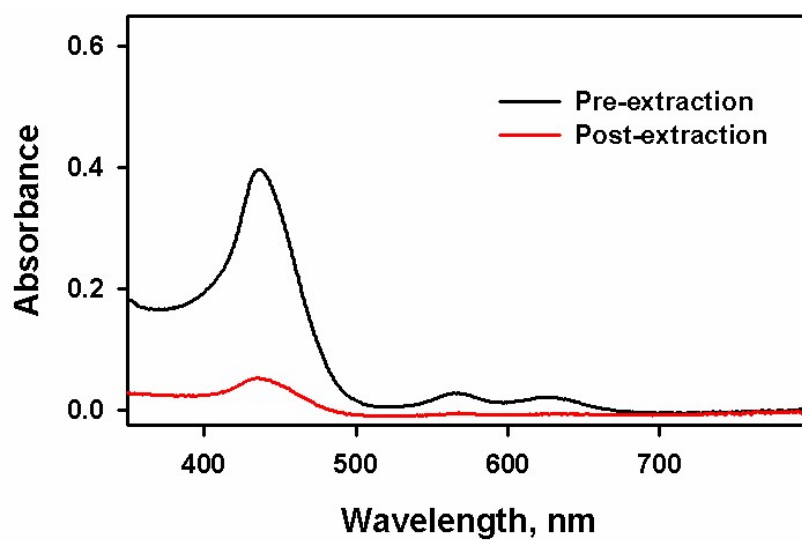

**Fig. S18.** UV-Visible spectra of compound **4** in aqueous phase before (black) and after (red) extraction with the water-saturated 1-octanol.

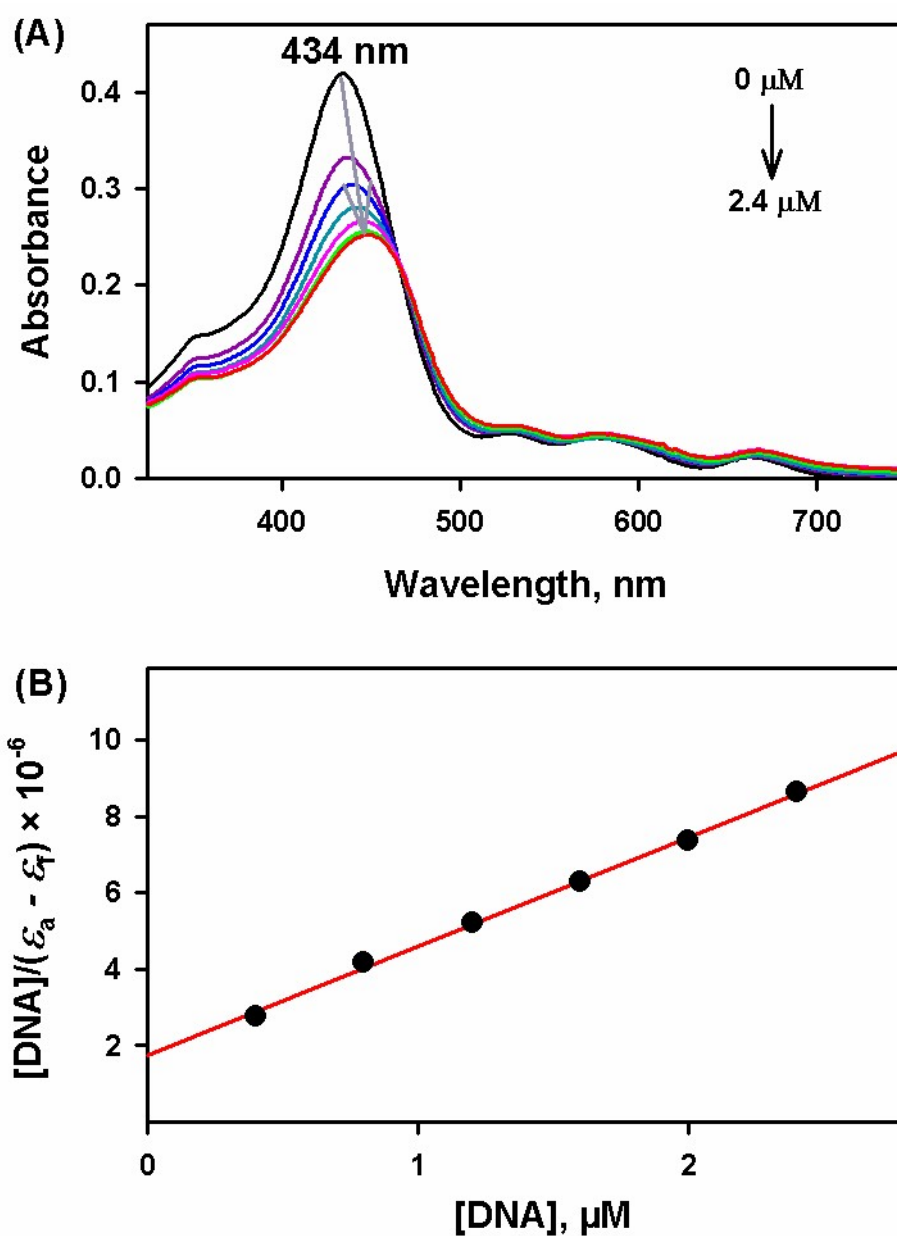

**Fig. S19.** (A) Absorption spectra of **2** in pH=7.2 buffer at 25 °C in the presence of the increasing amount of CT-DNA.  $[\mathbf{2}] = 6 \mu\text{M}$ ,  $[\text{DNA}] = \text{Increment of } 0.4 \mu\text{M}$ . The grey arrow indicates the change in absorption upon increasing the DNA concentration. (B) A plot of  $[\text{DNA}]/(\Delta\epsilon)$  vs.  $[\text{DNA}]$ .

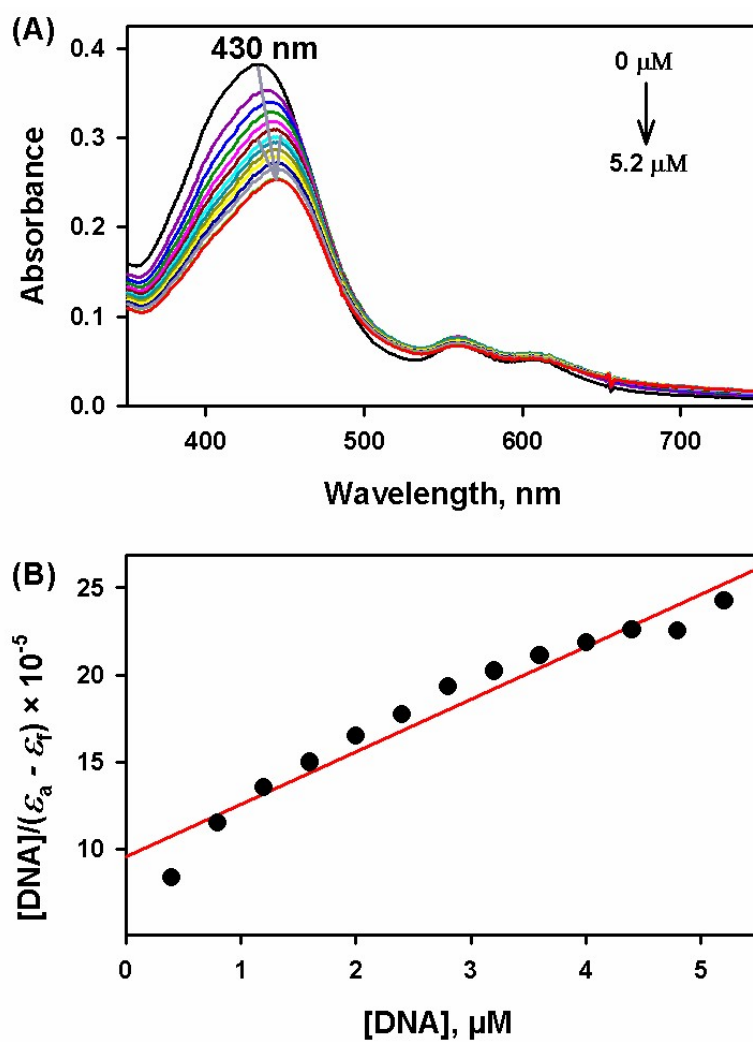

**Fig. S20.** (A) Absorption spectra of **3** in pH = 7.2 buffer at 25 °C in the presence of an increasing amount of CT-DNA. [**3**] = 6 μM, [DNA] = Increment of 0.4 μM. The grey arrow indicates the change in absorption upon increasing the DNA concentration. (B) A plot of  $[DNA]/(\Delta\epsilon)$  vs. [DNA].

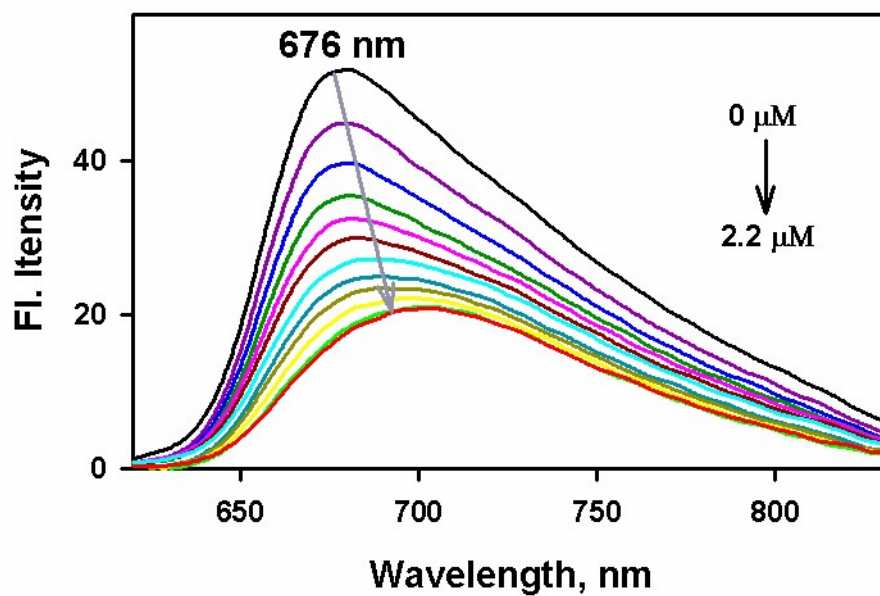

**Fig. S21.** Fluorescence emission spectra of **2** in pH = 7.2 buffer solution, with increasing concentration of CT-DNA.  $[2] = 6 \mu\text{M}$ ,  $[\text{DNA}] = \text{increment of } 0.2 \mu\text{M}$ . The grey arrow indicates the change in emission intensity upon increasing the complex concentration.

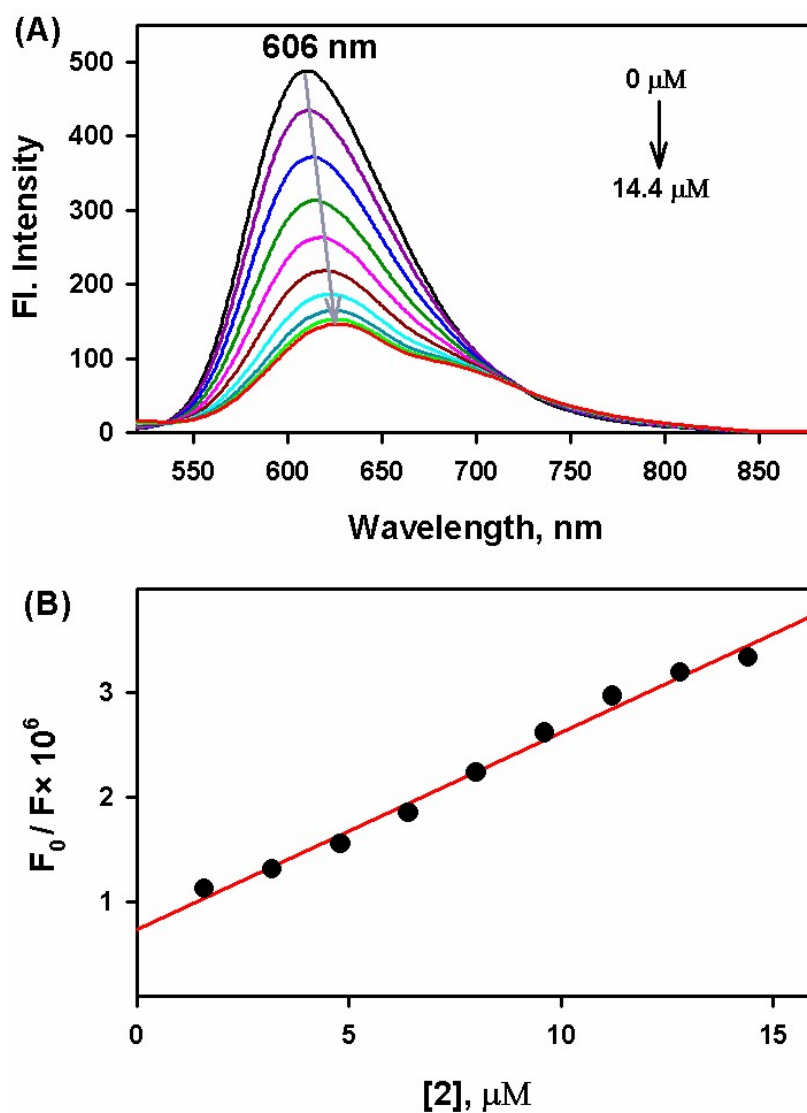

**Fig. S22.** (A) Emission spectra of EB bound to DNA in the presence of porphyrins, (A) 2 with increasing concentration of CT DNA. [DNA] = 12  $\mu\text{M}$ , [EB] = 5  $\mu\text{M}$ , [2] = 1.6  $\mu\text{M}$  increment. The grey arrow indicates the change in emission intensity upon increasing the concentration of [2]. (B) Fluorescence quenching curve of EB bound DNA by the porphyrins.



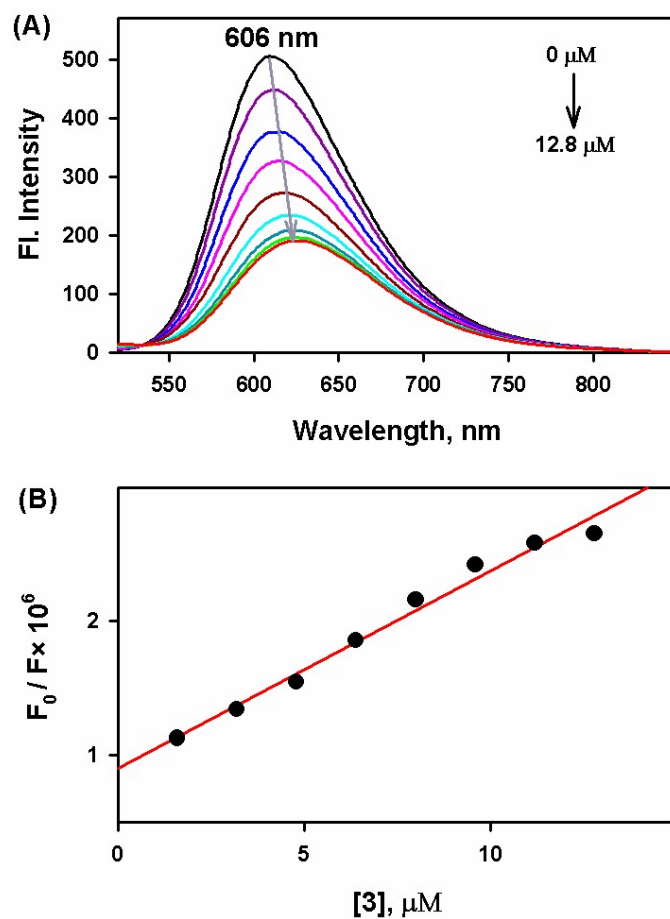

**Fig. S23.** Emission spectra of EB bound to DNA in the presence of porphyrins, (A) **3** with increasing concentration of CT DNA. [DNA] = 12  $\mu\text{M}$ , [EB] = 5  $\mu\text{M}$ , [**3**] = 1.6  $\mu\text{M}$  increment. The grey arrow indicates the change in emission intensity upon increasing the concentration of [**3**] (B) Fluorescence quenching curve of EB bound DNA by the porphyrins.

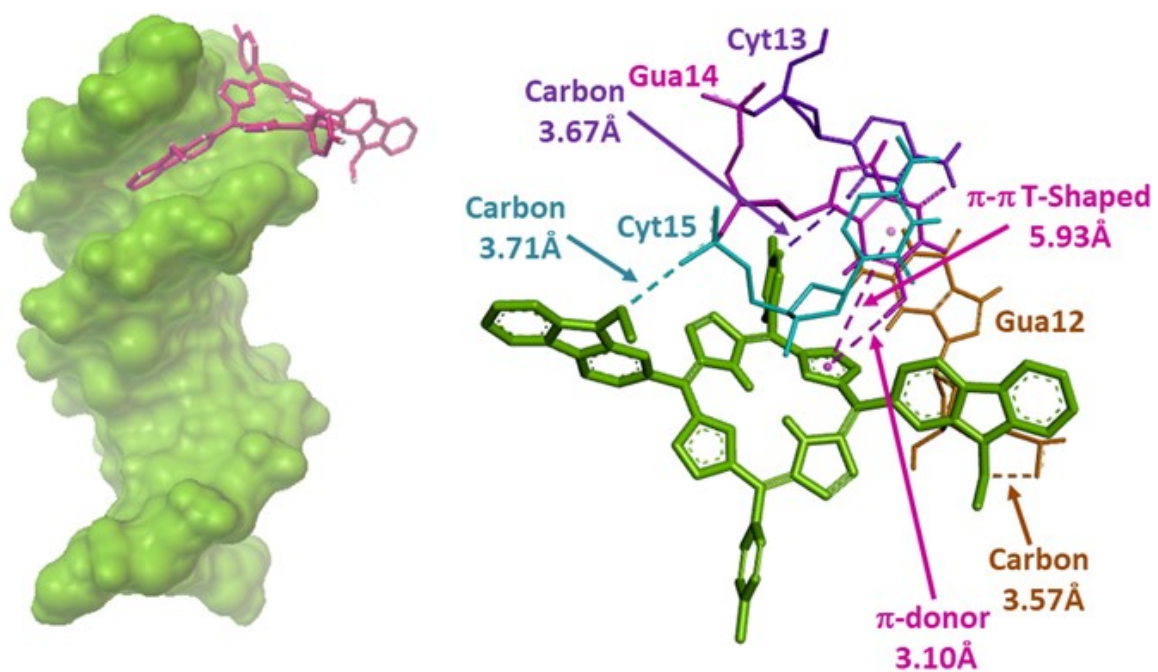

**Fig. S24.** Molecular docked structure and interactions of **2** with DNA.

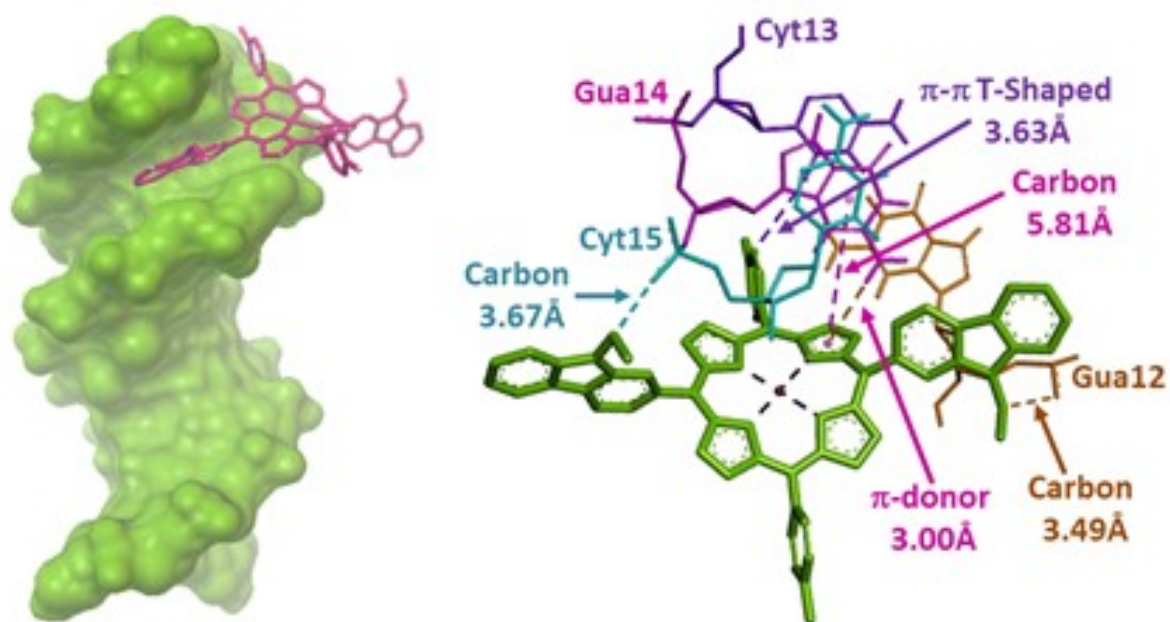

**Fig. S25.** Molecular docked structure and interactions of **3** with DNA.

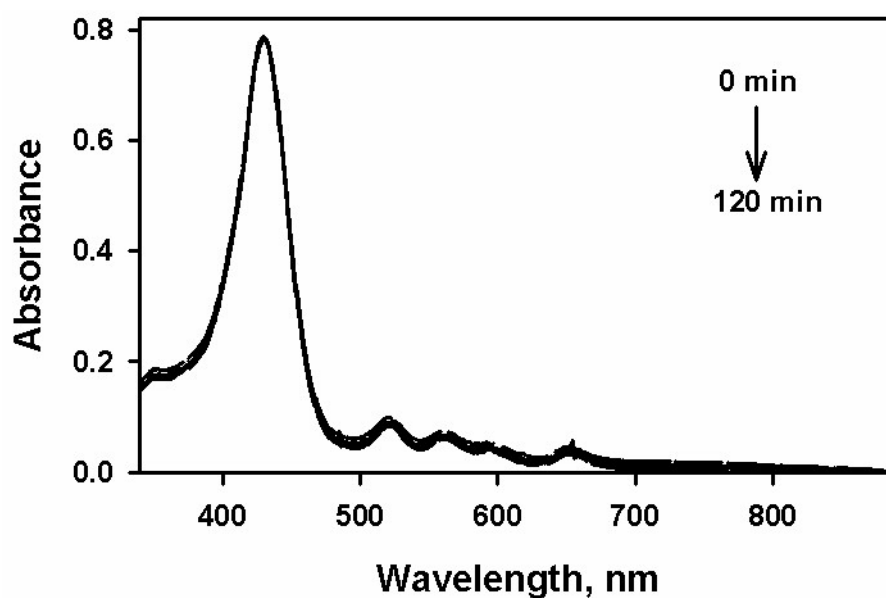

**Fig. S26.** The time-dependent absorption spectrum of compound **2** under the light source of  $\lambda = 450\text{--}750\text{ nm}$ ,  $15\text{ J cm}^{-2}$ .

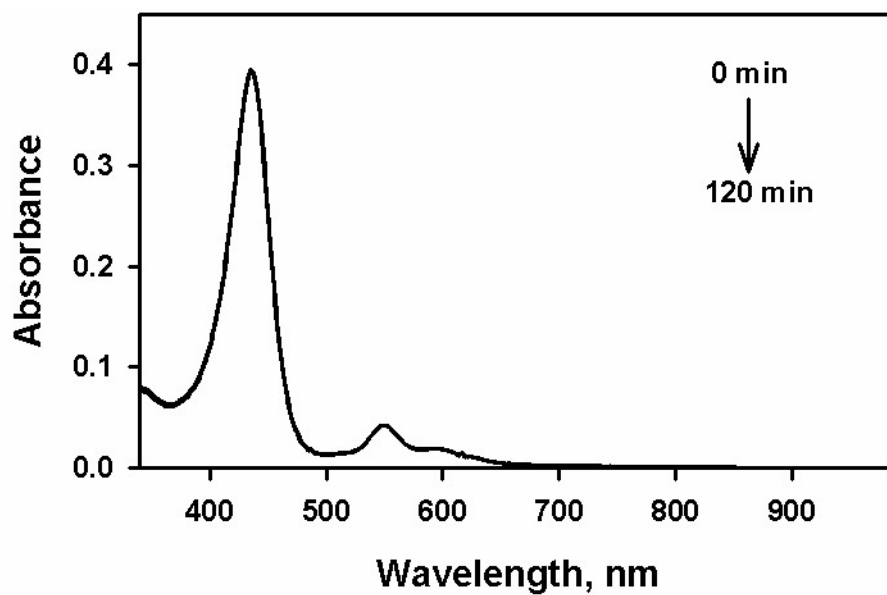

**Fig. S27.** The time-dependent absorption spectrum of compound **3** under the light source of  $\lambda = 450\text{--}750\text{ nm}$ ,  $15\text{ J cm}^{-2}$ .

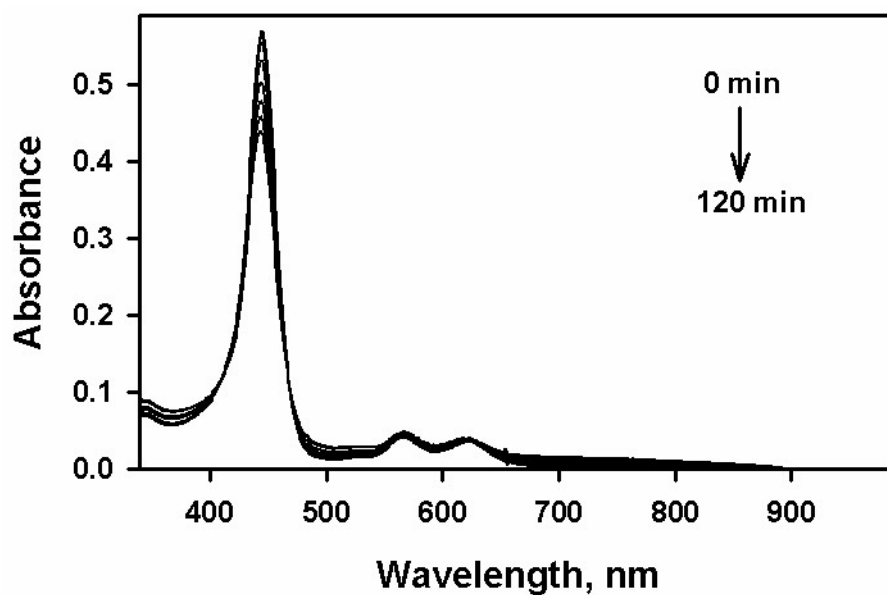

**Fig. S28.** The time-dependent absorption spectrum of compound **4** under the light source of  $\lambda = 450\text{--}750\text{ nm}$ ,  $15\text{ J cm}^{-2}$ .

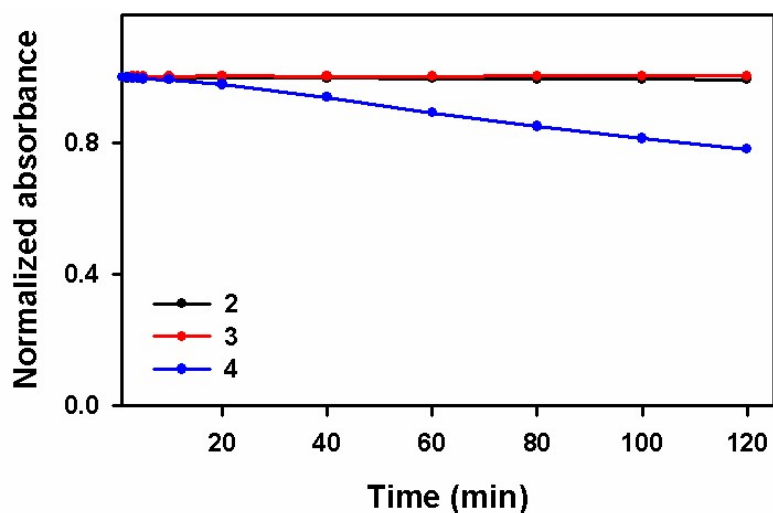

**Fig. S29.** Change in absorbance of compound 2-4 with an increase in time of irradiation under the light source of  $\lambda = 450\text{--}750$  nm,  $15 \text{ J cm}^{-2}$ .

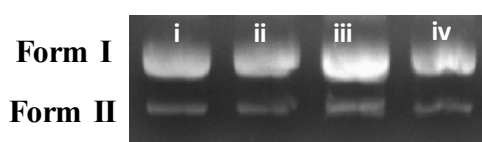

**Fig. S30.** Effect of  $\text{NaN}_3$  on the cleavage in presence of compounds 2-4. Lane (i): DNA alone; Lane (ii): DNA+10  $\mu\text{M}$  2+ 50  $\mu\text{M}$   $\text{NaN}_3$ ; Lane (iii): DNA+10  $\mu\text{M}$  3 + 50  $\mu\text{M}$   $\text{NaN}_3$ ; Lane (iv): DNA+10  $\mu\text{M}$  4 + 50  $\mu\text{M}$   $\text{NaN}_3$ .

**Table S1** Electrochemical data of 2-4 in DMF using 0.1 M TBAHFP at  $25^\circ\text{C}$ .

| Compound                            | $E_{1/2}(\text{oxd})/\text{V}$ |      | $E_{1/2}(\text{red})/\text{V}$ |       | Energy Level (eV) |                   | $\Delta E$ (eV)<br>(From CV) |
|-------------------------------------|--------------------------------|------|--------------------------------|-------|-------------------|-------------------|------------------------------|
|                                     |                                |      |                                |       | HOMO <sup>a</sup> | LUMO <sup>a</sup> |                              |
| <b>H<sub>2</sub>TPP<sup>1</sup></b> | 1.08                           | -    | -1.11                          | -1.53 | -5.48             | -3.29             | 2.19                         |
| <b>CuTPP<sup>1</sup></b>            | 1.01                           | 1.26 | -1.19                          | -1.71 | -5.41             | -3.21             | 2.20                         |
| <b>ZnTPP<sup>1</sup></b>            | 0.79                           | 1.38 | -1.34                          | -1.73 | -5.19             | -3.06             | 2.13                         |
| <b>2</b>                            | 0.69                           | 1.04 | -1.00                          | -1.71 | -5.09             | -3.40             | 1.69                         |
| <b>3</b>                            | 0.68                           | 1.01 | -1.09                          | -1.80 | -5.08             | -3.31             | 1.77                         |
| <b>4</b>                            | 0.54                           | 0.99 | -1.14                          | -1.66 | -4.94             | -3.26             | 1.68                         |

<sup>a</sup> $E_{\text{HOMO}} = -(E_{\text{oxd}} + 4.4) \text{ eV}$ ;  $E_{\text{LUMO}} = -(E_{\text{red}} + 4.4) \text{ eV}$ , <sup>a</sup>*Chem. Commun*, 48 (2012), 8377

<sup>1</sup> J. Ramesh, S. Sujatha and C. Arunkumar, *RSC Adv.*, 2016, **6**, 63271-63285.
